# Supplementary material for: Calcium Sensor SlCBL4 Associates with SlCIPK24 Protein Kinase and Mediates Salt Tolerance in Solanum lycopersicum
Source: MDPI journal article supplement (doi:10.3390/plants10102173), 2021-10-14
Supplement: s1 [file s1]

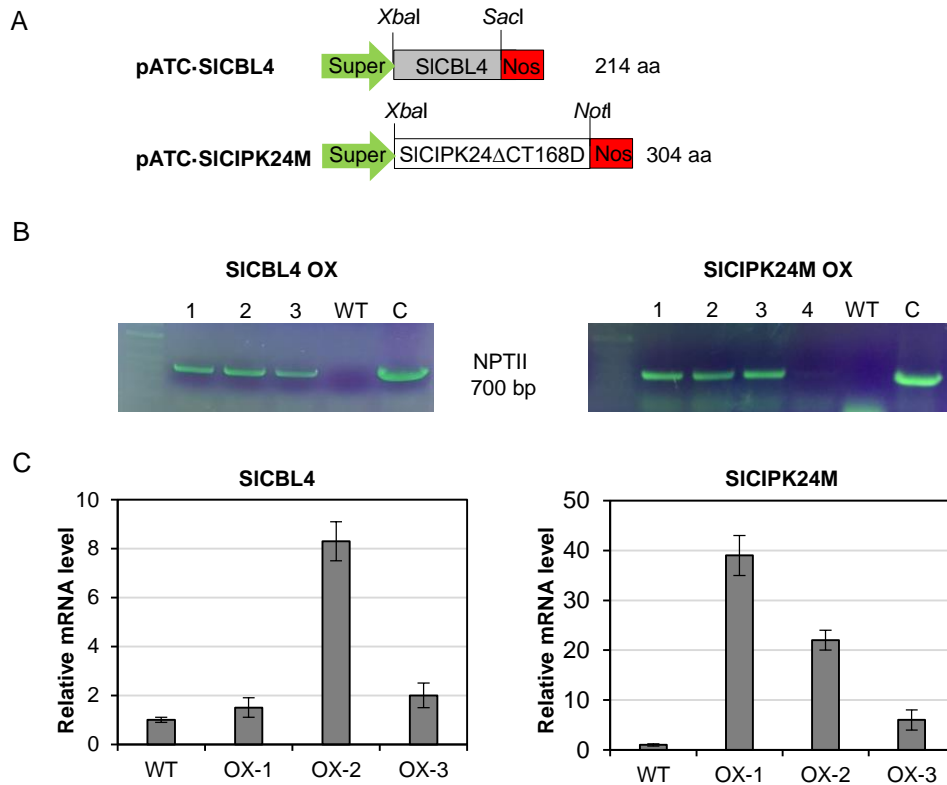

**Supplemental Figure S1.** Isolation of transgenic tomato (cv. Moneymaker) plants overexpressing SICBL4 or superactive SICIPK24 mutant. (A) Schematic diagrams of the pATC·SICBL4 and pATC·SICIPK24M. (B) PCR analysis showing the presence of the overexpression constructs in the transgenic lines. Genomic DNAs prepared from the indicated plants was amplified with a pair of primers (NPTII-F: 5'- GCTGCTCTGATGCCCGCGTGTCCG-3', NPTII-R: 5'- AACTCGTCAAGAAGGCGATAGAAGGC -3) to produce a 700 bp fragment of the kanamycin resistance gene (NPTII). Lane C contains the PCR product from the plasmid template and serves as a positive control. (C) Real-time qRT-PCR analysis of the transcript levels in the WT and transgenic tomato lines. Total RNA was extracted from 3-week-old tomato plants. *SlActin7* was employed as an internal control for transcript normalization. The expression levels of *SICBL4* and *SICIPK24* in WT plants were respectively set to 1.0 to show their relative abundance in the transgenic plants. Error bars denote standard deviation (SD) of three technical replicates. Values are significantly different (the Student's *t*-test,  $P \leq 0.05$ ).

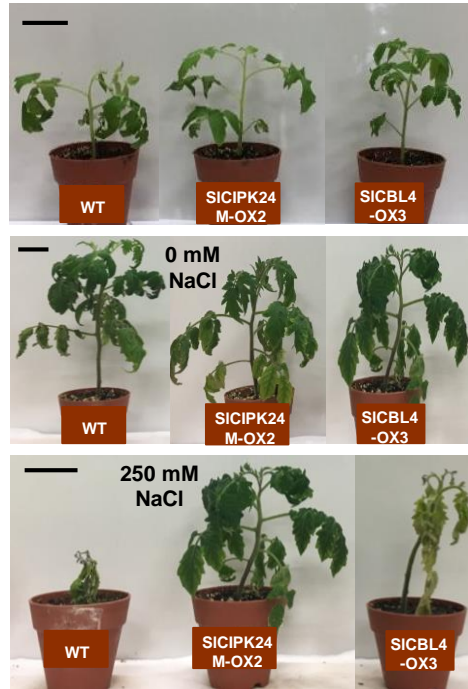

**Supplemental Figure S2. Salt stress tolerance of the mature transgenic plants.** Three-week-old plants (top panel) of the indicated lines were treated with 0 mM (middle panel) or 250 mM NaCl solution (bottom panel). The photos were taken on the 21<sup>st</sup> day after treatment. *Scale bars*, 5 cm. All the experiments were performed in three biological replicates.

**Supplemental Table S1.** Primers used for plasmid construction. Restriction enzyme sites were underlined. Three additional bases were included at the 5' end of the primers for efficient restriction enzyme digestion.

| Primers      | Sequences 5' to 3' (Restriction enzyme site)    |
|--------------|-------------------------------------------------|
| SICBL4-1     | TAT <u>GAATTC</u> GATGGGCTGCTTTCCCTCAA (EcoRI)  |
| SICBL4-2     | TTT <u>GTCGAC</u> CTAGACTTCCGAATCTTCCA (Sall)   |
| SICBL4-3     | AA <u>ACCATGG</u> TAATGGGCTGCTTTCCCTCA (NcoI)   |
| SICBL4-4     | AAA <u>ACTAGT</u> GACTTCCGAATCTTCCACCT (SpeI)   |
| c-Myc-2      | AA <u>AGCGGCCG</u> CAAGATCCTCCTCAGAAATCA (NotI) |
| SICBL4-5     | TAT <u>GTCGAC</u> ATGGGCTGCTTTCCCTCAAA (Sall)   |
| SICBL4-6     | TT <u>ACTCGAGG</u> ACTTCCGAATCTTCCACCT (XhoI)   |
| SICBL4-7     | ATA <u>ACTAGT</u> ATGGGCTGCTTTCCCTCAAA (SpeI)   |
| SICBL4-8     | TA <u>AGAGCTC</u> CTAGACTTCCGAATCTTCCA (SacI)   |
| SICIPK24-1   | AA <u>AGGATCC</u> CATGAAGAAAGTGAAGAGAA (BamHI)  |
| SICIPK24-2   | AAT <u>GTCGAC</u> TCAGCGAGTCCTTGTCTCTAA (Sall)  |
| SICIPK24-3   | TTT <u>GTCGAC</u> TACTCACTATCTTCTGATTTTT (Sall) |
| SICIPK24-4   | TCT <u>GGATCC</u> GAGTGGTCCCTTGGTAATGA (BamHI)  |
| SICIPK24-5   | AA <u>AGGATCC</u> CATGAAGAAAGTGAAGAGAAA (BamHI) |
| SICIPK24-6   | AA <u>ATCTAGA</u> ATGAAGAAAGTGAAGAGAAA (XbaI)   |
| SICIPK24-7   | AAT <u>GGATCC</u> GCGAGTCCTTGTCTCTAAGCA (BamHI) |
| SICIPK24-8   | AA <u>ACCATGG</u> TAATGAAGAAAGTGAAGAGA (NcoI)   |
| SICIPK24-9   | AAA <u>ACTAGT</u> GCGAGTCCTTGTCTCTAAGCA (SpeI)  |
| SICIPK24-10  | TTT <u>GCGGCCG</u> CACTCACTATCTTCTGATT (NotI)   |
| SICIPK24-TD1 | GTCGAGCTCCTCTATGACACTTGTGGGACTCC                |
| SICIPK24-TD2 | GGAGTCCCACAAGTGTCATAGAGGAGCTCGAC                |

**Supplemental Table S2.** Primers used for quantitative real-time RT-PCR.

| Primers           | Sequence 5' to 3'         | Size   |
|-------------------|---------------------------|--------|
| SICBL4 Forward    | CTGCTGGCTGCTGAGACCGCTTTTA | 181 bp |
| SICBL4 Reverse    | CAAATAGATCAAAAATCCTGTCTGC |        |
| SICIPK24 Forward  | TAAGCATAGAATGGTTGAACAGATC | 179 bp |
| SICIPK24 Reverse  | CAGAAAGCCTACCTAGATGAACAAT |        |
| SIRD29B Forward   | GTCACCGATCCAACAGGCGCCAACA | 224 bp |
| SIRD29B Reverse   | CCAACCGAGGGGAAAACAGTAGGCG |        |
| SIRD22 Forward    | GAGAATGTGAAGAGCCAGGTATTA  | 191 bp |
| SIRD22 Reverse    | GTCATTGTTGTTTCCCATTTTCTTG |        |
| TAS14 Forward     | TCGATCCGACAGCTCTAGCTCGTCG | 172 bp |
| TAS14 Reverse     | AGGGATCTTGTCCTTGATTTTGTCC |        |
| SIActin7 Forward  | TGCTAGCGGTCGTACCACTGGTATT | 181 bp |
| SIActin7 Reverse  | TACAATTTCCCGTTCAGCAGTAGTG |        |
| SITubulin Forward | AACCTCCATTCAGGAGATGTTTAGA | 180 bp |
| SITubulin Forward | TCTGCTGTAGCATCCTGGTATTGAA |        |
